# Supplementary material for: miRNome Profiling Detects miR-101-3p and miR-142-5p as Putative Blood Biomarkers of Frailty Syndrome
Source: MDPI journal article supplement (doi:10.3390/genes13020231), 2022-01-26
Supplement: s1 [file s1]

**Table S1.** Clinical features of the recruited subjects.

| Subject | Group | Sex | Age (years) | Weight (Kg) | Height (cm) | BMI (kg/m2) | Handgrip (Kg) | Walking speed (s) | Weight loss (Kg) | PASE  | GDS | MMSE | ADL | IADL | PCS  | MCS  |
|---------|-------|-----|-------------|-------------|-------------|-------------|---------------|-------------------|------------------|-------|-----|------|-----|------|------|------|
| 1       | 1     | 1   | 75          | 74          | 165         | 27.4        | 16.9          | 3.6               | 2                | 226.0 | 0   | 21.0 | 6   | 8    | 47.8 | 51.4 |
| 3       | 1     | 1   | 72          | 62          | 155         | 25.8        | 24.4          | 5.1               | 7                | 242.0 | 12  | 22.3 | 6   | 6    | 49.6 | 44.6 |
| 4       | 1     | 2   | 82          | 85          | 175         | 27.7        | 27.6          | 3.1               | 0                | 231.3 | 2   | 27.7 | 6   | 5    | 53.5 | 44.9 |
| 12      | 2     | 2   | 91          | 80          | 165         | 29.6        | 11.2          | 19.0              | 2                | 40.0  | 0   | 24.0 | 4   | 2    | 20.9 | 46.0 |
| 13      | 1     | 1   | 90          | 45          | 150         | 20.0        | 17.6          | 5.0               | 0                | 114.5 | 7   | 28.0 | 6   | 7    | 43.6 | 49.2 |
| 14      | 2     | 1   | 82          | 55          | 158         | 22.0        | 5.8           | na                | 0                | 62.9  | 11  | 24.0 | 4   | 0    | 31.4 | 42.2 |
| 17      | 1     | 2   | 76          | 86          | 168         | 30.4        | 22.7          | 2.9               | 0                | 217.0 | 0   | 26.7 | 6   | 5    | 56.1 | 45.4 |
| 18      | 2     | 1   | 86          | 51          | 155         | 21.2        | 11.8          | 5.7               | 6                | 0.0   | 0   | 25.2 | 6   | 4    | 30.8 | 51.3 |
| 19      | 1     | 1   | 85          | 56          | 155         | 23.3        | 13.2          | 5.0               | 0                | 187.0 | 0   | 25.4 | 6   | 8    | 30.7 | 48.1 |
| 21      | 1     | 1   | 82          | 80          | 165         | 29.4        | 18.6          | na                | 10               | 216.0 | 4   | 26.4 | 6   | 8    | 43.3 | 57.5 |
| 22      | 2     | 1   | 78          | 66          | 155         | 27.5        | 15.3          | 8.7               | 5                | 111.0 | 11  | 25.0 | 6   | 8    | 36.4 | 25.7 |
| 23      | 1     | 2   | 77          | 76          | 175         | 25.3        | 34.5          | 2.0               | 0                | 263.0 | 0   | 27.0 | 6   | 5    | 55.9 | 55.9 |
| 24      | 1     | 2   | 77          | 78          | 175         | 26.0        | 21.4          | 3.3               | 0                | 106.0 | 0   | 28.7 | 6   | 4    | 43.3 | 57.5 |
| 25      | 1     | 1   | 74          | 72          | 160         | 28.1        | 16.9          | 4.4               | 0                | 111.0 | 4   | 27.3 | 5   | 6    | 41.6 | 57.6 |
| 26      | 1     | 1   | 84          | 65          | 160         | 23.0        | 14.9          | 5.0               | 0                | 131.0 | 0   | 29.4 | 6   | 8    | 45.7 | 44.2 |
| 27      | 2     | 1   | 81          | 77          | 155         | 32.0        | 7.2           | 9.3               | 8                | 136.7 | 11  | 25.4 | 6   | 8    | 22.9 | 51.0 |
| 28      | 2     | 1   | 87          | 92          | 150         | 40.0        | 14.4          | 11.7              | 0                | 60.0  | 0   | 25.2 | 5   | 1    | 20.6 | 49.8 |
| 30      | 2     | 1   | 84          | 68          | 168         | 26.5        | 15.1          | 9.8               | 0                | 40.0  | 0   | 22.4 | 4   | 0    | 31.2 | 40.1 |
| 33      | 1     | 1   | 76          | 60          | 155         | 25.0        | 16.4          | 3.8               | 0                | 194.5 | 1   | 28.0 | 6   | 8    | 46.6 | 52.8 |
| 34      | 1     | 2   | 83          | 65          | 160         | 25.4        | 27.3          | 2.2               | 0                | 201.0 | 0   | 26.1 | 6   | 5    | 55.3 | 60.7 |
| 35      | 2     | 1   | 85          | 60          | 158         | 24.0        | 7.5           | na                | 6                | 20.0  | 0   | 22.4 | 4   | 0    | 28.3 | 48.9 |
| 36      | 1     | 1   | 80          | 50          | 144         | 24.1        | 16.2          | 7.9               | 0                | 151.0 | 12  | 28.4 | 6   | 8    | 51.9 | 28.3 |
| 37      | 1     | 2   | 86          | 67          | 165         | 24.8        | 20.4          | 3.3               | 3                | 523.0 | 7   | 30.0 | 6   | 4    | 40.4 | 55.2 |
| 39      | 2     | 1   | 83          | 73          | 158         | 30.0        | 7.7           | 13.0              | 0                | 40.0  | 12  | 25.7 | 5   | 7    | 26.9 | 35.2 |
| 41      | 2     | 1   | 82          | 74          | 160         | 28.9        | 10.2          | 11.5              | 5                | 60.0  | 0   | 26.4 | 5   | 3    | 29.4 | 48.3 |
| 42      | 1     | 1   | 82          | 78          | 160         | 30.4        | 18.3          | 3.2               | 0                | 187.0 | 4   | 29.5 | 6   | 6    | 51.0 | 43.1 |
| 43      | 2     | 1   | 92          | 65          | 160         | 25.4        | 12.7          | 8.1               | 0                | 40.0  | 0   | 23.2 | 6   | 6    | 27.7 | 48.1 |
| 45      | 1     | 2   | 76          | 75          | 175         | 24.5        | 34.9          | 2.7               | 0                | 161.0 | 13  | 25.7 | 6   | 5    | 51.5 | 34.5 |
| 46      | 1     | 1   | 79          | 76          | 160         | 29.7        | 15.8          | 3.5               | 0                | 148.1 | 0   | 26.7 | 6   | 8    | 40.6 | 54.4 |

|    |   |   |    |    |     |      |      |     |    |       |    |      |   |   |      |      |
|----|---|---|----|----|-----|------|------|-----|----|-------|----|------|---|---|------|------|
| 47 | 2 | 1 | 78 | 76 | 150 | 33.7 | 12.6 | 3.6 | 0  | 66.7  | 13 | 28.7 | 6 | 3 | 49.0 | 48.9 |
| 48 | 2 | 2 | 79 | 54 | 168 | 19.3 | 28.0 | 5.1 | 10 | 69.5  | 0  | 23.0 | 6 | 0 | 43.9 | 37.3 |
| 49 | 2 | 2 | 85 | 90 | 177 | 28.7 | 21.1 | 9.0 | 10 | 40.0  | 0  | 23.4 | 6 | 3 | 35.2 | 47.8 |
| 50 | 2 | 2 | 81 | 65 | 160 | 25.4 | 29.4 | 4.8 | 7  | 54.3  | 0  | 26.4 | 6 | 5 | 35.6 | 52.9 |
| 52 | 1 | 2 | 90 | 76 | 170 | 26.3 | 29.6 | 4.2 | 0  | 42.9  | 0  | 26.0 | 6 | 2 | 44.5 | 53.7 |
| 53 | 1 | 1 | 90 | 50 | 150 | 22.2 | 11.1 | 8.5 | 0  | 126.0 | 0  | 23.2 | 5 | 5 | 44.9 | 58.2 |
| 55 | 1 | 1 | 83 | 52 | 160 | 20.3 | 18.1 | na  | 0  | 146.0 | 0  | 22.4 | 6 | 7 | 54.9 | 44.8 |
| 56 | 2 | 2 | 87 | 65 | 150 | 29.3 | 17.2 | 8.5 | 2  | 40.0  | 0  | 23.2 | 6 | 1 | 27.6 | 47.8 |
| 58 | 1 | 1 | 86 | 62 | 156 | 25.8 | 19.0 | 5.4 | 0  | 111.0 | 0  | 23.4 | 5 | 5 | 44.3 | 57.0 |
| 60 | 2 | 2 | 77 | 78 | 172 | 26.9 | 15.1 | 7.8 | 0  | 20.0  | 8  | 23.3 | 5 | 3 | 26.7 | 40.1 |
| 61 | 2 | 2 | 77 | 58 | 170 | 20.0 | 27.5 | 6.1 | 6  | 40.0  | 0  | 28.7 | 6 | 5 | 49.3 | 51.4 |
| 62 | 2 | 2 | 81 | 64 | 160 | 25.0 | 11.6 | 6.0 | 0  | 34.3  | 7  | 24.4 | 6 | 4 | 26.9 | 34.6 |

Group: 1=Robust, 2=Frail. Sex: 1=Female, 2=Male. Body Mass Index (BMI), Physical Activity Scale for the Elderly (PASE), Geriatric Depression Scale (GDS), Mini-Mental State Examination (MMSE), Activities of Daily Living (ADL), Instrumental Activity of Daily Living (IADL), Physical Component Summary (PCS), Mental Component Summary (MCS), not assessed (na).

**Table S2.** Statistical analyses of clinical and biochemical data of the subjects included in the study.

| Parameter   | Units       | Robust (n=20)   | Frail (n=19)      | p-value           |
|-------------|-------------|-----------------|-------------------|-------------------|
| Age         | years       | 82 (4.9)        | 82.9 (4.4)        | na                |
| Female sex  | -           | 12/20           | 11/19             | na                |
| BMI         | kg/m2       | 25.6 (3.0)      | 27.1 (5.0)        | na                |
| ADL         | -           | 5.9 (0.3)       | 5.4 (0.8)         | 0.01              |
| IADL        | -           | 6.1 (1.8)       | 3.3 (2.7)         | <b>&lt;0.0001</b> |
| PCS         | -           | 47.3 (6.5)      | 31.6 (8.3)        | <b>&lt;0.0001</b> |
| MCS         | -           | 49.8 (8.3)      | 44.6 (7.3)        | 0.07              |
|             |             |                 |                   |                   |
| UA          | mg/dL       | 5.2 (1.7)       | 5.3 (1.7)         | 0.88              |
| U-UA        | mg/dL       | 26.2 (9.9)      | 22.4 (12.4)       | 0.31              |
| ALB         | g/L         | 4.3 (0.3)       | 4.0 (0.5)         | 0.05              |
| ALT         | U/L         | 11.1 (3.4)      | 12.9 (8.2)        | 0.39              |
| AST         | U/L         | 20.4 (4.0)      | 19.6 (5.1)        | 0.61              |
| CRE         | mg/dL       | 0.9 (0.4)       | 1.0 (0.3)         | 0.40              |
| U-CRE       | g/L         | 0.9 (0.4)       | 0.8 (0.6)         | 0.80              |
| ALP         | U/L         | 80.3 (19.8)     | 87.6 (32.1)       | 0.40              |
| GGT         | U/L         | 28.1 (29.2)     | 43.9 (42.4)       | 0.18              |
| hsCRP       | mg/L        | 3.0 (3.5)       | 6.9 (10.6)        | 0.15              |
| PRO         | g/L         | 7.0 (0.4)       | 6.7 (0.5)         | 0.05              |
| GFR         | mL/min      | 84.3 (27.9)     | 68.1 (21.8)       | 0.06              |
| UREA        | mg/dL       | 43.4 (15.6)     | 53.0 (19.8)       | 0.10              |
| GSHtot      | umol/L      | 1254.2 (262.5)  | 1169.7 (309.5)    | 0.37              |
| GSHrid      | umol/L      | 1104.5 (234.7)  | 10728 (257.4)     | 0.69              |
| GSHratio    | %           | 88.5 (8.3)      | 92.5 (7.6)        | 0.13              |
| BAP         | uEq/L       | 2361.4 (273.9)  | 2387.2 (251.8)    | 0.77              |
| ROM         | Ucarr       | 371.4 (42.6)    | 363.5 (47.1)      | 0.59              |
| REDOX index | norm. ratio | 0.9 (0.1)       | 0.9 (0.2)         | 0.46              |
| 3NT         | ug/L        | 231.9 (600.3)   | 623.4 (791.5)     | 0.09              |
| U-8OHdG     | ug/g creat  | 167.2 (499.9)   | 3941.3 (12510.4)  | 0.22              |
| U-8OHdG_U   | ug/g urate  | 343.5 (868.0)   | 14007.1 (44926.1) | 0.19              |
| U-2dG       | ug/g creat  | 227.7 (462.1)   | 241.3 (529.9)     | 0.93              |
| U-2dG_U     | ug/g urate  | 1132.9 (2822.1) | 1759.6 (5574.5)   | 0.67              |
| U8OH2dG/2dG | ng/ug       | 191.5 (815.2)   | 5616.9 (21450.5)  | 0.28              |
| TNFalpha    | ng/L        | 28.0 (37.4)     | 20.0 (14.5)       | 0.40              |
| sTNF-R      | ug/L        | 3.6 (1.7)       | 6.1 (3.4)         | <b>0.01</b>       |
| IL-1        | ng/L        | 0.6 (0.8)       | 0.9 (1.1)         | 0.44              |
| IL-6        | ng/L        | 3.1 (2.4)       | 3.5 (2.5)         | 0.59              |

Biochemical samples from two robust patients were not available. Data are reported as mean (S.D.). Two-tailed t-test; significant p-values are reported in bold. Body Mass Index (BMI), Activities of Daily Living (ADL), Instrumental Activity of Daily Living (IADL), Physical Component Summary (PCS), Mental Component Summary (MCS), uric acid (UA), urinary uric acid (U-UA), albumin (ALB), alanine aminotransferase (ALT), aspartate aminotransferase (AST), creatinine (CRE), urinary creatinine (U-CRE), alkaline phosphatase (ALP), gamma glutamyl transferase (GGT), high-sensitivity C-reactive protein (hsCRP), total protein (PRO), glomerular filtration rate test (GFR), total glutathione (GSH tot), reduced glutathione (GSH rid), GSH ratio (GSH rid/GSH tot), biological antioxidant potential (BAP), reactive oxygen metabolites (ROM), plasma 3-nitrotyrosine (3NT), urinary 8-hydroxy-deoxyguanosine (U-8OHdG), urinary 2-deoxyguanosine (U-2dG), tumor necrosis factor alpha (TNFalpha), soluble tumor necrosis factor receptor (sTNF-R), Interleukin-1 (IL-1), Interleukin-6 (IL-6).
